# Supplementary material for: An NF-κB- and Therapy-Related Regulatory Network in Glioma: A Potential Mechanism of Action for Natural Antiglioma Agents
Source: MDPI journal article supplement (doi:10.3390/biomedicines10050935), 2022-04-19
Supplement: s1 [file s1]

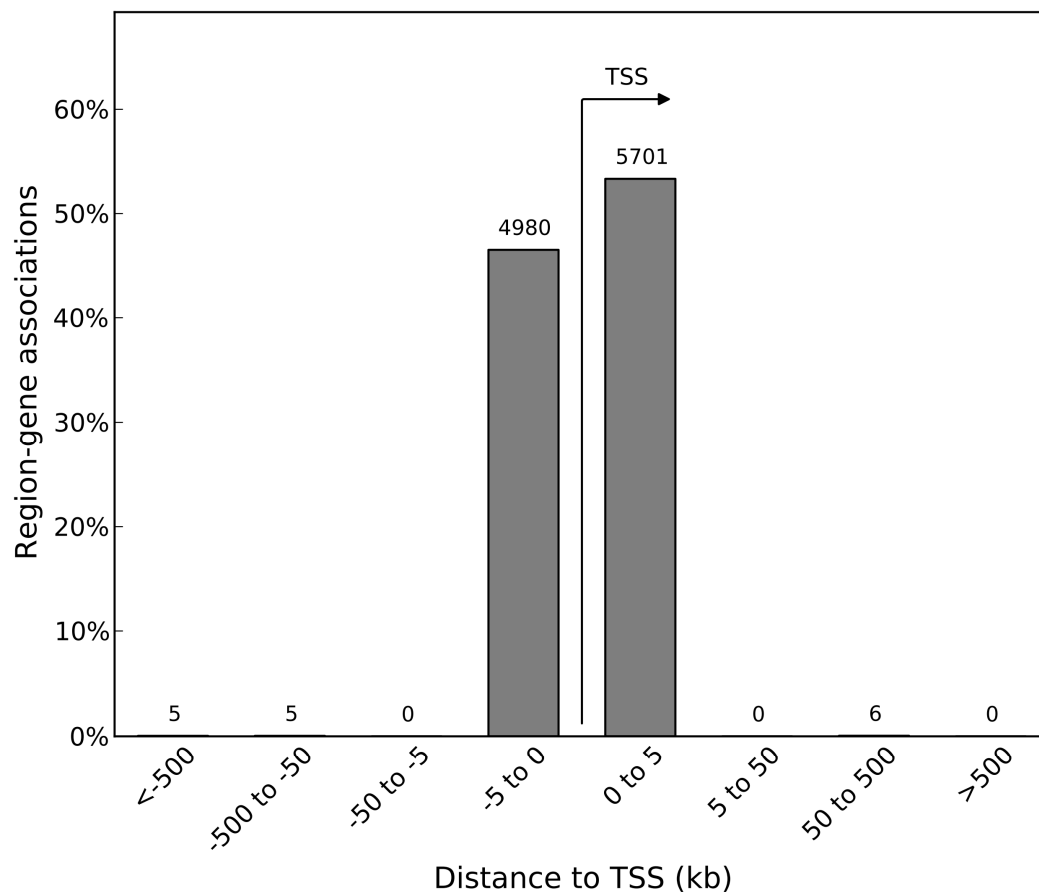

**Figure S1:** Distance of NF-kB binding sites to human genes promoters. The distance to Transcription Start Sites (TSS) was calculated implementing GREAT analysis. Distances to Transcription Start Sites (TSS) are shown, divided into 0-5, 5-50, 50-500 and >500 kb.
